# Supplementary material
Source: PubMed Central journal article supplement (PMC6445383)

Supporting Information for

**Mass spectrometry reveals a multi-faceted role of glycosaminoglycan chains**

**in factor Xa inactivation by antithrombin**

*Burcu B. Minsky, Rinat R. Abzalimov, Chendi Niu, Yunlong Zhao, Zachary Kirsch, Paul L. Dubin, Sergey N. Savinov and Igor A. Kaltashov*

**Figure S1.** Native ESI mass spectra of the early-eluting SEC fractions of the 1.3:1 AT/fXa mixtures incubated in the presence of 10x molar excess of dp6 (top) and dp20 (bottom) in 30 mM ammonium acetate. The insets show the corresponding SEC chromatograms (absorbance at 232 nm).

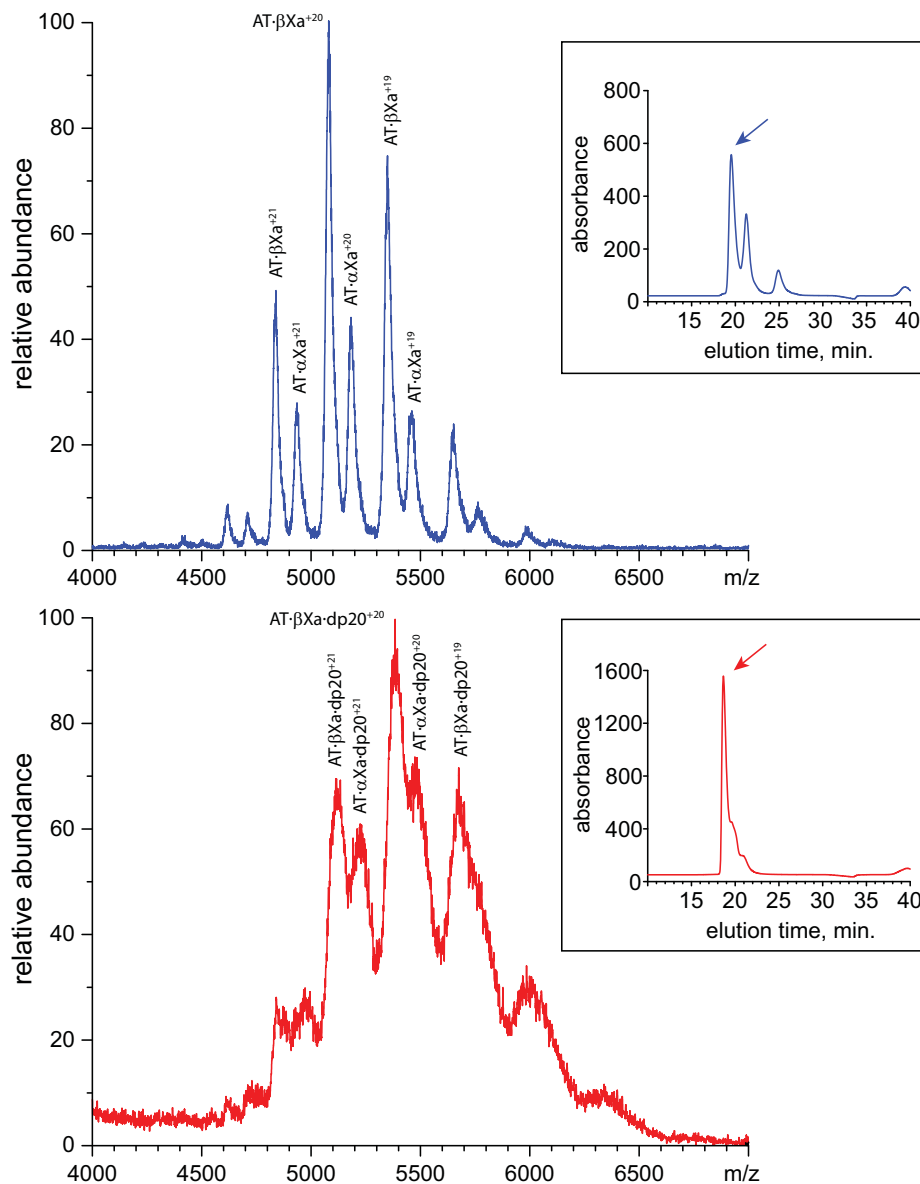

Supplement: NIHMS1010570-supplement-supplementary_materials.pdf [file NIHMS1010570-supplement-supplementary_materials.pdf]
